# Supplementary material for: T-cell Dysfunction upon Expression of MYC with Altered Phosphorylation at Threonine 58 and Serine 62
Source: Oxford University Press journal article supplement (doi:10.1158/1541-7786.mcr-21-0560), 2022-04-05
Supplement: mcr-21-0560_figure_s6_suppsf6.pdf [file mcr-21-0560_figure_s6_suppsf6.pdf]

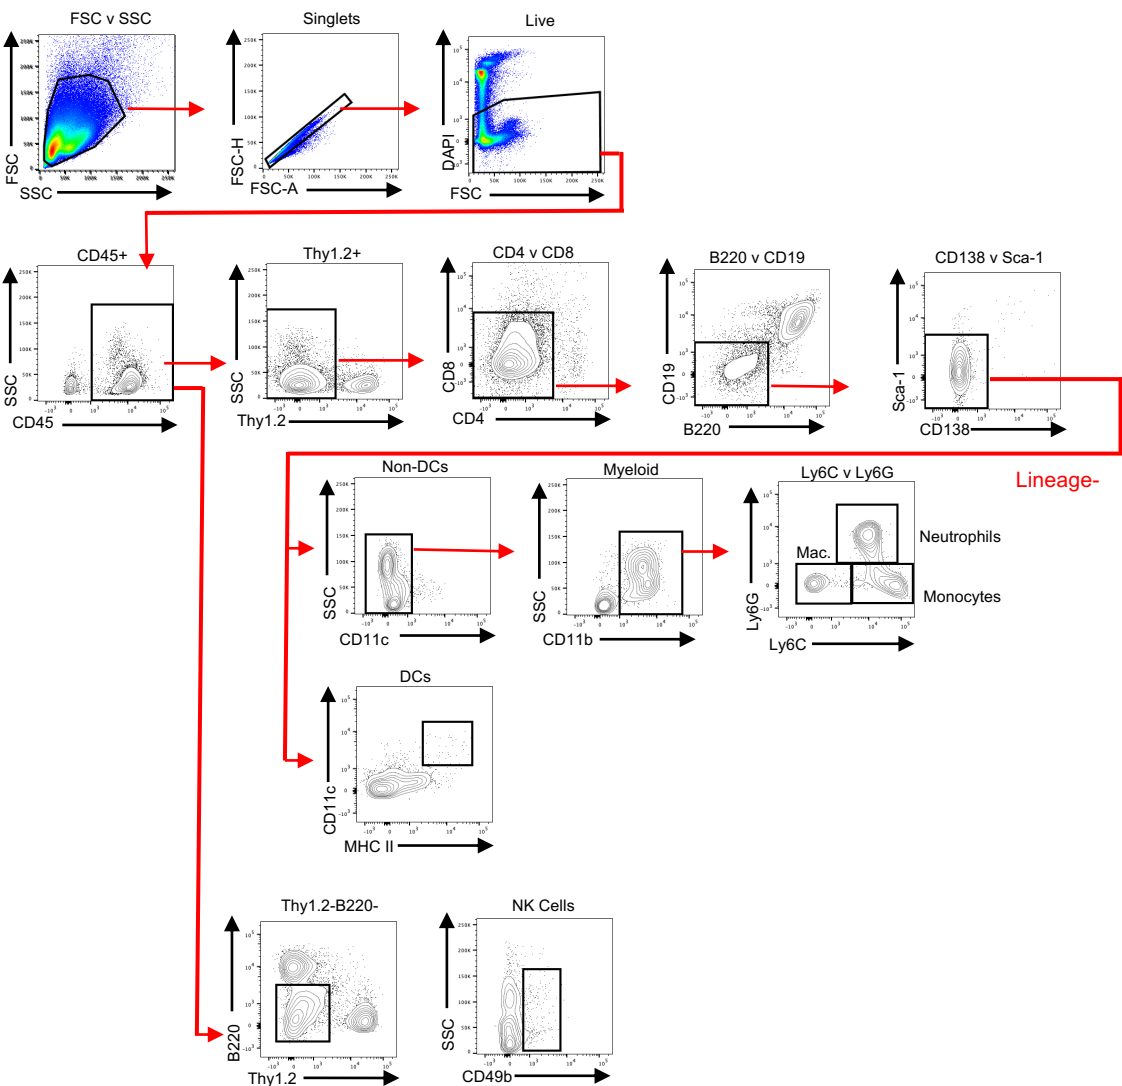

**Figure S6: Gating scheme for other immune cell subsets**

All tumors were analyzed for the percentage of CD45<sup>+</sup> leukocytes that were macrophages, monocytes, neutrophils, DCs or NK cells. Lineage-negative cells (Thy1.2-CD4-CD8-B220-CD138-Sca-1<sup>-</sup>) were analyzed for expression of CD11c, CD11b, Ly6C, Ly6G, MHC II as indicated (middle rows). Thy1.2-B220<sup>-</sup> cells were analyzed for CD49 $\beta$  expression as indicated to identify NK cells (bottom row). All data shown are from a normal spleen.
