# Supplementary material for: T-cell Dysfunction upon Expression of MYC with Altered Phosphorylation at Threonine 58 and Serine 62
Source: Oxford University Press journal article supplement (doi:10.1158/1541-7786.mcr-21-0560), 2022-04-05
Supplement: mcr-21-0560_supplementary_table_s1_suppst1.xlsx [file mcr-21-0560_supplementary_table_s1_suppst1.xlsx]

## Sheet: Sheet1
Supplemental Table S1: Genotyping and Recombination Primer sequences
Name	Sequence
pROSA884F	5’-AAAGTCGCTCTGAGTTGTTAT-3’
pBigT86R	5’-GCGAAGAGTTTGTCCTCAACC-3’
pROSA1447R	5’-GGAGCGGGAGAAATGGATATG-3’
Cre1	5'-ACCAGCCAGCTATCAACTCG-3'
Cre2	5'-TTACATTGGTCCAGCCACC-3'
Cre3	5'-CTAGGCCACAGAATTGAAAGATCT-3'
Cre4	5'-GTAGGTGGAAATTCTAGCATCATCC-3'
Myc flox 5’	5'-CACCGCCTACATCCTGTCCATTC-3'
Myc flox 3’	5'-TACAGTCCCAAAGCCCCAGCCAAG-3'
Lck-Promoter-F	5’-CCTTGGTGGAGGAGGGTGGAATGAA-3’
Cre-Coding-R	5’-AATGTTGCTGGATAGTTTTTACTGC-3’
Myc224R	5’-GCAGCGAGTCCGAGGAAGG-3’
pBigT254	5’-GCCTTGGGAAAAGCGCCTC-3’
