# Supplementary material for: T-cell Dysfunction upon Expression of MYC with Altered Phosphorylation at Threonine 58 and Serine 62
Source: Oxford University Press journal article supplement (doi:10.1158/1541-7786.mcr-21-0560), 2022-04-05
Supplement: mcr-21-0560_supplementary_table_s3_suppst3.xlsx [file mcr-21-0560_supplementary_table_s3_suppst3.xlsx]

## Sheet: Cytopathology analysis report
Supplemental Table S3: Cyptopathology analysis report. H&E stained tumor samples were analyzed at 20x and 40x.
Mouse ID	Genotype	Age (days)	FFPE Tissue	T-cell Lymphoma	B-cell Lymphoma	Remarks by pathologist
Normal control tissue
A057	MYCWT no cre	66	spleen			normal architecture.
C042	MYCT58A no cre	106	thymus/spleen			normal architecture. Thymus shows cortex and medulla. Spleen show red pulps and white pulps
C245	MYCT58A no cre	47	spleen			normal architecture
H176	MYCT58AMYCfl/fl no cre	40	thymus/spleen			normal architecture
I119	MYCS62AMYCfl/fl no cre	45	spleen			normal architecture
I141	MYCS62AMYCfl/fl no cre	48	thymus			normal architecture
Thymic Lymphoma
H67	MYCT58AMYCfl/fl	113	thymus/lung	x		Thymus shows disrupted archtecture by small lymphocytes and plasma cells. Lung tissue with reserved architecture and small lymphocytes and plasma cells at submucosa.
H67	MYCT58AMYCfl/fl	113	liver/spleen	x		Liver normal. Spleen has small lymphocytic infiltrates.
H71	MYCT58AMYCfl/fl	123	thymus	x		There is lung tissue with lymphocytic infiltrates (25%) from serousa to deep tissue. Thymus shows no normal medulla and contains diffuse sheets of lymphocytes
H71	MYCT58AMYCfl/fl	123	liver/spleen	x		Liver normal. Spleen has small lymphocytic infiltrates.
H74	MYCT58AMYCfl/fl	128	thymus	x		There is relatively normal lung tissue. Thymus shows total archtecture disruption with lymphocytic infiltrates
H74	MYCT58AMYCfl/fl	128	liver/spleen	x		Liver normal. Spleen has small lymphocytic infiltrates.
H100	MYCT58AMYCfl/fl	150	thymus/spleen	x		thymus with lymphocytes and adipose tissue. Spleen shows lymphocytic infiltrates.
H103	MYCT58AMYCfl/fl	104	thymus/spleen	x		thymus with diffuse lymphocytic infiltrates. Spleen shows lymphocytic infiltrates and prominent extramedulary hematopoiesis
H119	MYCT58AMYCfl/fl	101	thymus/spleen	x		thymus and spleen shows lymphocytic infiltrates
H392	MYCT58AMYCfl/fl	184	thymus/spleen	x		thymus missing medulla, compatible with diffuse infiltrates. Spleen shows nodular lymphocytic infitrates
H393	MYCT58AMYCfl/fl	110	thymus/spleen	x		thymus missing medulla, compatible with diffuse infiltrates. Spleen shows nodular lymphocytic infitrates
H415	MYCT58AMYCfl/fl	101	liver/thymus/spleen	x		thymus missing medulla, compatible with diffuse infiltrates. Spleen shows nodular lymphocytic infitrates. Normal liver
H520	MYCT58AMYCfl/fl	95	liver/thymus/spleen	x		liver perivascular lymphocytic infiltrates with dilated central vein. Thymus and spleen diffuse lymphocytic infiltrates
I42	MYCS62AMYCfl/fl	148	thymus/spleen	x		thymus shows prominent appoptosis. Spleen shows red pulp lymphocytic infiltrates and nodular white pulp expension.
I45	MYCS62AMYCfl/fl	199	thymus	x		thymus with diffuse infiltrates. Lung tissue with interstitial fibrosis. Lymphoblastic T-cell lymphoma
I45	MYCS62AMYCfl/fl	199	liver/spleen			normal liver and spleen
I112	MYCS62AMYCfl/fl	147	liver/thymus/spleen	x		normal liver. Spleen with red pulp lymphocytic infiltrates. Thymus diffuse lymphocytic infiltrates
I116	MYCS62AMYCfl/fl	135	thymus/spleen	x		thymus with diffuse infiltrates. Spleen with red pulp lymphocytic infiltrates
Splenomegaly with thymic mass
I82	MYCS62AMYCfl/fl	346	thymus/spleen		x	plasmacytic infiltrates in both.
I83	MYCS62AMYCfl/fl	664	liver/thymus/spleen		x	liver parivescular lymphocytic infiltrates with giant cell granulomas. Thymus/tumor shows similar infitltrates as seen in the liver. Spleen nodular infiltrates. Aggressive B-cell based on nuclear architecture.
I86	MYCS62AMYCfl/fl	202	liver/thymus/spleen		x	liver portal lymphocytic infiltrates. Thymus diffuse lymphoplasmacytic infiltrates, spleen red pulp infiltrates.
I118	MYCS62AMYCfl/fl	605	liver/thymus/spleen		x	liver nodular infiltratres. Spleen sinusoidal infiltrates. Thymus lymphocytic infiltrate in medula. Lots of apoptosis.
I259	MYCS62AMYCfl/fl	379	liver/thymus/spleen		x	liver normal. Thymus and spleen show lymphocytic infiltrates. Aggressive apoptosis
I260	MYCS62AMYCfl/fl	301	liver/spleen		x	liver with portal infiltrates and spleen nearly replaced by lymphocytic infiltrates. Lots of plasma cells.
I170	MYCS62AMYCfl/fl	185	liver/thymus/spleen		x	all show lymphocytic infiltrates. Lymphoplasmacytic
I440	MYCS62AMYCfl/fl	653	liver/thymus/spleen		x	all show lymphocytic infiltrates. High grade lymphoma with starry sky.
I442	MYCS62AMYCfl/fl	653	liver/spleen		x	liver normal. Spleen extensively involved by lymphocytic infiltrates. Lymphoplasmacytic
