# Supplementary material for: T-cell Dysfunction upon Expression of MYC with Altered Phosphorylation at Threonine 58 and Serine 62
Source: Oxford University Press journal article supplement (doi:10.1158/1541-7786.mcr-21-0560), 2022-04-05
Supplement: mcr-21-0560_supplementary_table_s4_suppst4.xlsx [file mcr-21-0560_supplementary_table_s4_suppst4.xlsx]

## Sheet: Complete immunophenotyping
	% of CD45+ cells
	Sample ID	Thymus	Spleen		H144	H213	H334	H471	H415	H392	H101	H128	H520	H204		I116	I109		I86	I440	I442	I411	I259
	T-cells	97.06	22.2728		79.7597	95.1902	96.4053	95.0772	87.9597	84.4281	83.0645	93.4822	99.485	99.6326		98.8547	99.1205		33.2568	48.0939	29.2795	13.3804	0.20508
	B-cells	0.292801	61.519		15.1534	1.45238	nd	4.22901	12.2935	1.62267	15.3565	6.75629	nd	0.313795		0	0		33.8766	43.6471	51.3949	71.3742	98.1458
	Other cells	0.0165804	10.9032		3.82996	0.210251	nd	nd	nd	nd	nd	0	nd	0.0394498		0.369265	0.102699		18.671	0.0762024	4.54873	13.1416	1.39618
	Unknown	2.6306	5.30499		1.25694	3.14715	3.59468	0.6938	-0.253187	13.9492	1.57899	0	0.514991	0.014108		0	0		14.1956	8.18277	14.7768	2.10384	0.252971
	DN T-cells	1.07975	2.02106		26.0797	0.49026	2.15809	9.16478	2.68457	2.02026	3.31887	3.19619	1.95984	2.7853		2.79881	2.9147		4.31393	0.838311	1.98789	10.7082	0.0552138
	CD4 CD8 DP T-cells	72.8532	0.50829		0.957014	93.2584	87.7377	74.0719	78.1752	72.1342	53.8925	46.2493	46.5259	9.74965		68.8433	60.7983		0.0870701	1.51944	1.32561	0.0669769	0.0315507
	CD4 SP T-cells	15.3449	15.6989		1.78231	0.910794	3.53375	5.33188	3.99063	4.39691	22.7588	41.4347	50.9849	86.0077		22.2003	29.8283		23.6	35.5695	19.0511	1.89845	0.0631014
	CD8 SP T-cells	6.46611	3.90657		49.3844	0.240119	1.16723	1.42893	1.52391	2.79722	0.415174	0.266188	0.263856	0.0668911		0.730524	0.633631		5.18859	10.0241	6.72615	0.646674	0.0552138
	TCRβ	20.3631	24.0964		64.0304	47.876	90.1459	33.7368	50.6231	23.5667	33.3468	26.2369	11.623	4.85235		8.48053	8.46575		28.6184	41.8128	26.8656	1.99314	0.20508
	TCRγδ	0.284966	0.638993		0.719096	0.930405	0.538721	1.03387	0.966887	3.87265	4.54165	13.9016	1.28276	88.6537		84.3836	84.4018		2.78229	1.62842	0.913271	0.169752	0
	CD24	93.2623	2.20743		49.3844	91.242	88.5714	38.9034	8.09007	14.3788	9.24323	91.509	88.6189	92.4808		95.0995	95.4357		7.62259	21.7164	7.76913	5.33968	0.141978
	B1 B-cells	0.0847696	14.3602		0.722431	0.0563268	nd	0.620203	3.26706	5.35693	0.244134	0.492441	nd	0.00682163		0.978541	0.114256		2.15404	0.100595	1.98465	3.79731	0.246573
	B2 MZ B-cells	0.00345998	1.99703		12.7299	0.959978	nd	0.2287	4.69139	0.222017	9.5702	1.49948	nd	0.00170541		0.00468201	0.0150904		0.294024	0.00838293	0.0933159	0.120393	0
	B2 FO B-cells	0.139697	39.696		0.0905173	0.0084793	nd	0.0310102	2.65271	8.77383	0.143899	0.150195	nd	0.0324027		0.011705	0.159527		11.2496	0.108978	31.2829	1.34208	0.0986291
	Plasma cells	0	0.156394		0	0	nd	0	0	0	1.44848	0	nd	0		0	0		2.80601	5.75069	5.19202	62.4207	97.5244
	DCs	0	0.222416		0.113744	0.000811781	nd	nd	nd	nd	nd	0.00634921	nd	0.00514562		0.00342971	0.000863014		1.47599	0.0044825	0.145997	0.0691603	0.0169233
	Macrophages	0	1.22812		0.0517792	0.00568246	nd	nd	nd	nd	nd	0.0285714	nd	0.00514562		0.00457294	0.00258904		2.77138	0	1.58225	0.672848	0.05077
	Monocytes	0.00221073	2.66899		0.269931	0.00162356	nd	nd	nd	nd	nd	0.0634921	nd	0.00171521		0.00914589	0.00431507		6.05966	0.00672374	0.316632	4.42157	0
	Neutrophils	0.00331609	3.54898		0.0993141	0.00487068	nd	nd	nd	nd	nd	0.0253968	nd	0.00686083		0	0		0.610326	0.0336187	0.619576	4.51183	0
	NK Cells	0.000954126	0.607528		0.09849	0.00174315	0	0	0	0	0.0714822	0.0212179	0	0.0043863		0.0103702	0.0129976		0.89049	0.0209578	0.431325	0.144347	0.0394384
			T-cell lymphoma																	0			1
			T-cell lymphoma
			B-cell/Plasma cell lymphoma
		Supplemental Table S4: Complete cell subset analysis of MYCT58A MYCfl/fl and MYCS62A MYCfl/fl tumors
