# Supplementary material for: T-cell Dysfunction upon Expression of MYC with Altered Phosphorylation at Threonine 58 and Serine 62
Source: Oxford University Press journal article supplement (doi:10.1158/1541-7786.mcr-21-0560), 2022-04-05
Supplement: mcr-21-0560_supplementary_table_s7_suppst7.xlsx [file mcr-21-0560_supplementary_table_s7_suppst7.xlsx]

## Sheet: Thymic mass vs T-cell lymphoma 
Supplemental Table S7: 1747 genes used to generate heatmap between thymic masses from MYCS62AMYCfl/fl mice with splenomegaly versus thymic lymphomas from MYCS62AMYCfl/fl (FDR adjusted p-value <0.05, FC cutoff +/- 1.5).
GeneSymbols	FDR adjusted p-value	log2FC
GPR25	9.19332e-220	6.86451
RASL11B	2.03916e-179	7.30959
TCF7	9.19137e-159	5.01083
ZFP704	6.98705e-144	4.79639
PHLDA1	3.73592e-132	6.06887
STRA6	1.69936e-129	6.27089
NKD1	9.88994e-129	8.31891
RAG1	5.84608e-128	9.85949
TUBB3	3.34732e-123	6.93942
4921525O09RIK	8.5253e-120	7.55643
MEX3A	3.34383e-114	5.14299
AXIN2	6.80335e-107	4.88879
GFI1	6.04445e-106	4.49497
PTPN14	3.28192e-88	4.5447
WWC1	8.36434e-88	10.6423
GLO1	1.2774e-76	3.67153
SYTL2	3.59949e-76	6.26737
AK5	7.41241e-76	9.17002
EGLN3	5.15612e-72	4.91307
CD8B1	9.47123e-69	5.27958
CECR2	2.17849e-67	5.51798
ZFP532	3.72741e-66	6.04907
ISM1	4.23374e-64	7.0337
CHDH	1.11609e-62	6.87505
NAV2	8.47538e-59	5.043
MYB	4.03956e-58	5.57211
SLC29A1	3.14594e-57	4.69229
MCU	4.77414e-56	3.81903
SH3BGRL2	7.67898e-54	3.91205
CPEB1	1.08505e-52	5.72483
5730559C18RIK	1.73727e-52	8.82165
TNFRSF19	4.0928e-52	7.88637
PODXL2	1.50466e-51	8.92678
MAP7	6.75614e-50	6.78118
FRAT2	4.34023e-49	4.50352
THEMIS	4.8865e-48	4.14571
CHML	1.34275e-45	4.34735
SOX4	2.40413e-45	5.37535
THY1	2.69703e-45	3.91953
CDH22	1.2202e-42	8.27173
RCOR2	2.06439e-42	4.9392
DDC	3.3605e-41	4.55373
SLC1A4	6.22704e-40	4.33873
GADD45G	1.9373e-39	4.69277
EDARADD	3.03342e-38	4.31215
HEMGN	1.24771e-37	4.68307
GM15612	2.47174e-37	6.82252
1700097N02RIK	4.17259e-37	7.392
BDH1	1.62753e-35	3.45326
NOTUM	1.62753e-35	8.40018
RPS6KA2	6.62588e-35	4.8664
SMYD1	1.17314e-34	5.50717
CAMK4	1.22824e-33	4.51034
CDCA7	2.29294e-33	3.40673
MYBPC1	2.84906e-33	6.37701
LRRC17	3.63462e-33	5.55659
FBLN1	7.33796e-33	4.22706
SH3RF3	2.54415e-31	5.64786
GATA3	9.65202e-31	3.25949
IL17RB	1.60456e-30	10.0365
TFRC	3.36766e-30	3.95077
VLDLR	4.27297e-30	4.67774
NHSL1	4.81086e-30	4.8445
HACD1	1.60783e-29	4.49046
ISLR2	2.35986e-29	6.59784
SH3RF1	3.99691e-29	3.47802
MTUS2	4.75539e-29	5.19229
IL12RB2	7.60574e-29	4.85098
DNAH8	1.46385e-28	4.01123
D430041D05RIK	1.57974e-28	12.713
TEAD1	6.9317e-28	3.91422
LEF1	1.89134e-26	4.0761
DESI1	1.91255e-26	3.34233
PROSER2	2.14679e-26	5.98529
CDH24	2.97292e-26	3.91477
XRCC6	1.12265e-25	3.18492
VANGL2	4.017e-25	4.01555
PROX1	5.08338e-25	6.84071
AKAP12	3.21228e-24	4.20926
TOM1L1	3.73675e-24	3.88584
SPOCK2	3.85614e-24	3.88295
REEP1	4.3882e-23	4.31392
ZFP703	4.4792e-23	3.85154
PTRH1	6.30525e-23	3.48492
MED13	8.21875e-23	3.4109
SERPINE2	8.21875e-23	3.95931
STRIP2	8.36863e-23	6.12183
TUBB2A	1.72886e-22	2.8963
NOVA1	3.81132e-22	3.65508
RELL1	5.63799e-22	4.17965
WNT5B	5.68425e-22	7.19794
BARX1	2.48217e-21	13.3609
FZD3	9.88791e-21	5.76722
APCDD1	1.53604e-20	6.43412
SHISA6	2.06126e-20	12.115
H2-Q1	3.34602e-20	8.62992
EDAR	3.62384e-20	6.6474
ADAMTS14	4.12134e-20	3.25594
SLC25A18	5.3732e-20	4.82973
SNAI3	1.16475e-19	6.36484
MBOAT2	3.57075e-19	5.17142
ESRP2	4.8571e-19	9.7797
NFE2L3	7.39888e-19	6.29379
SHF	5.92337e-18	4.35099
SOX14	6.15078e-18	30.984
KREMEN1	1.02854e-17	3.30715
TRIM2	1.03181e-17	3.659
KCNN2	1.68891e-17	11.5546
SIM2	1.89662e-17	14.529
CADM4	1.91395e-17	6.86377
BMP7	4.57729e-17	3.77411
MIXL1	7.11438e-17	12.4813
ITGAM	1.14763e-16	3.50272
EMID1	1.15646e-16	3.3173
9530077C05RIK	1.21309e-16	5.15649
ZAK	1.24307e-16	2.76474
SGIP1	1.52479e-16	7.23778
2810408A11RIK	2.01471e-16	4.02386
TMEM136	2.76206e-16	4.18536
SCML2	3.00598e-16	5.75592
GM12709	3.16239e-16	10.5314
SLC25A27	3.52043e-16	3.7303
EFHD1	3.65893e-16	8.38036
GTF2IRD1	3.89596e-16	3.35598
FHIT	4.68574e-16	4.23257
TBX4	6.10486e-16	10.814
FST	6.28501e-16	7.59969
FREM2	8.31805e-16	12.0486
CYP39A1	9.88702e-16	5.95324
SP5	1.33169e-15	10.5375
DNAH9	2.20673e-15	10.6506
MCOLN3	2.2788e-15	4.83838
AI115009	2.61153e-15	10.1354
WIF1	3.68838e-15	12.7476
TCTEX1D1	4.45417e-15	10.328
ENC1	6.1387e-15	4.22583
ANK3	7.39755e-15	7.06095
KRT5	9.03505e-15	6.79466
9230105E05RIK	1.21671e-14	11.3997
BB031773	1.53884e-14	10.0606
2610307P16RIK	1.69868e-14	5.88548
RAG2	2.28874e-14	7.12001
ESX1	2.79581e-14	9.25241
ACOT5	3.22034e-14	11.3514
RNF182	3.29337e-14	9.99061
CCDC33	4.75005e-14	6.41642
GNA14	5.47495e-14	3.27212
LIMCH1	6.40842e-14	3.25307
TWIST2	6.8381e-14	5.02896
SEMA6C	7.1115e-14	3.37906
KLF17	8.24234e-14	10.3256
ELFN2	8.39611e-14	8.94946
CACNA1B	8.69703e-14	4.74521
A930003A15RIK	9.53141e-14	7.59258
LZIC	1.51517e-13	4.06758
ABHD12B	1.56082e-13	10.4148
CDKN1A	1.82464e-13	2.71657
TMEM151B	2.12494e-13	4.3458
ACVR2B	2.15521e-13	3.01225
CDR2L	2.92488e-13	2.81559
MROH3	3.36939e-13	10.1134
GREB1	1.02988e-12	5.95197
CRHBP	1.61594e-12	11.4974
4930425O10RIK	1.7813e-12	9.73707
ASCL4	2.1339e-12	6.22141
IGSF21	2.76323e-12	10.6735
EPHB2	2.86829e-12	5.52859
LAD1	3.89085e-12	7.4642
HUNK	5.70877e-12	6.62603
SALL2	7.17257e-12	3.07611
MAPK10	8.60313e-12	8.04558
PRKAA2	9.58457e-12	6.19936
IL5RA	1.33165e-11	5.57275
WNT6	2.18779e-11	5.06326
SLC30A2	3.63129e-11	3.08262
A330093E20RIK	6.3307e-11	9.49422
DNTT	9.96995e-11	6.73914
OIT3	1.03886e-10	4.83071
PRSS56	1.55079e-10	9.38436
ELAVL4	2.10533e-10	11.4137
PHACTR1	3.42794e-10	3.62128
H19	3.65953e-10	8.53923
AIFM3	4.32928e-10	8.80329
PRR18	4.79718e-10	6.03871
FOXB1	5.84189e-10	4.58455
2700081O15RIK	5.96452e-10	2.4991
KDM5B	6.03004e-10	2.24923
DFNA5	6.54109e-10	3.61283
SPINK13	8.21675e-10	6.31175
VGLL1	8.4774e-10	22.4779
H2-Q2	1.03166e-09	5.27479
EFR3B	1.06227e-09	3.21355
IQCD	1.09442e-09	4.35759
2810410L24RIK	1.89778e-09	4.06399
RNF125	1.9004e-09	3.13766
NYAP1	2.12485e-09	3.17268
DIO1	2.21776e-09	8.8995
5830411N06RIK	2.36613e-09	6.49215
MDM1	2.39264e-09	3.24341
RORC	3.79523e-09	5.99589
1810019D21RIK	4.22105e-09	7.02058
PTPRZ1	4.2355e-09	8.04982
ACAN	4.54961e-09	10.2
KCNH3	5.0014e-09	3.68843
GRAP2	5.78378e-09	2.38596
SHISA2	6.15011e-09	6.57037
SPRN	7.40619e-09	6.36642
TET1	7.716e-09	2.95661
CDK15	1.01939e-08	9.2468
1500009L16RIK	1.02488e-08	5.04922
TRPV6	1.15406e-08	7.14551
4931403E22RIK	1.23671e-08	5.48287
CWH43	1.39143e-08	10.8293
RBM24	1.42673e-08	6.78265
TDRKH	1.51297e-08	3.18957
NMNAT1	1.5781e-08	3.24277
CCDC30	1.58249e-08	3.79267
EPHB6	1.8241e-08	4.16468
PEG10	2.17678e-08	8.16816
2300002M23RIK	2.18036e-08	6.54261
EGFEM1	2.33309e-08	10.5011
SNORA26	2.53661e-08	3.98683
MYRFL	2.75517e-08	8.99434
SCRN1	2.9397e-08	8.60365
DUOXA1	3.80405e-08	7.92027
DLX3	4.4456e-08	7.74182
SLC17A8	4.54788e-08	6.52098
ADAMTS20	4.89516e-08	4.75328
C330024C12RIK	6.00351e-08	9.46608
RAPGEF4	6.11481e-08	3.09076
4930415F15RIK	6.71933e-08	7.37836
IQCH	6.7972e-08	7.99
PRPH	7.34075e-08	5.16168
CNNM1	7.74777e-08	9.89388
LSMEM1	8.4901e-08	5.28868
BEX1	8.8925e-08	5.23036
CCR9	1.10732e-07	4.24294
NPFFR1	1.1776e-07	7.31564
LEXM	1.29196e-07	7.62928
WNK2	1.34713e-07	7.18039
FAM205C	1.37787e-07	7.94341
SLC10A5	1.41368e-07	8.05293
RAPGEFL1	1.57697e-07	4.27227
ALMS1	1.5846e-07	2.35296
2700046A07RIK	1.94575e-07	8.93312
FAM188B	2.10285e-07	4.34212
DMRTB1	2.55982e-07	5.28779
ARSI	2.92981e-07	6.47268
SOCS5	3.72487e-07	3.70373
XRCC5	3.75065e-07	2.81833
TMEM181B-PS	4.25971e-07	2.78884
LRFN2	4.3432e-07	4.70524
GM1647	4.35851e-07	7.92988
EFNA4	4.83755e-07	3.06976
TNNI1	5.37466e-07	6.04335
FGF8	5.72508e-07	7.41992
OTOP1	6.28037e-07	9.41894
CD8A	7.13536e-07	3.81707
LYPD6B	7.20461e-07	4.60255
A930009A15RIK	7.67336e-07	7.24309
ZKSCAN16	7.85087e-07	7.34792
TEX15	8.53343e-07	6.15986
SATB1	8.54261e-07	3.86069
CDX1	8.64591e-07	6.48467
GNAO1	8.71473e-07	7.04046
FBN2	8.73477e-07	5.66657
CDK3-PS	8.87803e-07	2.97899
PDE10A	8.99895e-07	2.75711
RFX4	9.42751e-07	9.80933
ZFYVE27	9.78924e-07	1.99879
LGR5	1.00398e-06	3.68653
SCUBE1	1.00513e-06	2.94589
RASGRP1	1.01203e-06	2.71642
ST8SIA2	1.12616e-06	4.42786
TSHB	1.36754e-06	7.00759
NEXN	1.40045e-06	3.91023
2310043L19RIK	1.42634e-06	5.30986
BEX4	1.52187e-06	7.00855
SEZ6	1.5408e-06	8.81362
CAMK1G	1.67002e-06	6.39699
CACNA1D	1.8003e-06	2.93064
CFAP74	2.48011e-06	4.88703
C1QL1	2.52127e-06	6.50351
ELFN1	2.54218e-06	4.21006
ADAMTS17	2.56685e-06	4.02894
INA	2.80447e-06	6.96942
GM16130	3.05239e-06	7.19947
4930452B06RIK	3.55949e-06	2.43612
LYPD6	3.87195e-06	6.77609
CD1D2	3.94233e-06	4.20486
3632451O06RIK	4.3107e-06	5.1807
MCCC1OS	4.87096e-06	3.6026
SEMA4G	5.49179e-06	3.10194
SCN5A	6.61403e-06	4.51408
CDH3	6.76857e-06	4.78531
GPR62	7.05456e-06	3.25913
TTC12	7.46435e-06	2.47998
ESYT3	7.68612e-06	3.57729
KCNU1	8.38842e-06	6.57191
HMGA2	8.40407e-06	4.64799
OGDHL	8.48049e-06	6.75385
TRIM29	9.04371e-06	2.84028
AA465934	1.04683e-05	2.4846
SPTBN2	1.04802e-05	3.33203
B230118H07RIK	1.06989e-05	2.63261
ALX3	1.09168e-05	4.62119
SERPINB5	1.13141e-05	6.06068
RTKN2	1.27385e-05	3.87239
ZFP2	1.2806e-05	3.03247
ADAM2	1.34979e-05	9.02681
SHROOM3	1.49712e-05	2.36712
UBASH3A	1.57566e-05	2.75898
SPAG16	1.61906e-05	9.08884
FAM196A	1.72956e-05	5.96068
5830473C10RIK	1.80108e-05	6.39475
6430571L13RIK	1.84256e-05	3.0835
ZCCHC14	1.91289e-05	2.96657
IMPA1	1.93368e-05	2.63035
BEST3	1.97594e-05	7.9928
E2F7	2.23909e-05	1.91869
ANXA8	2.32111e-05	3.10259
EVA1C	2.36019e-05	4.61251
BB019430	2.59434e-05	7.29653
TRO	2.60338e-05	4.76245
PAX2	2.71264e-05	6.21864
MAP9	2.73418e-05	3.369
DEFB1	3.54956e-05	6.43185
HEBP2	3.65631e-05	5.99747
GPR87	3.69623e-05	5.98115
GRTP1	3.8283e-05	3.49968
NEBL	3.91921e-05	3.76073
FAM185A	4.00526e-05	4.17311
CLDN10	4.01797e-05	3.89789
LINGO4	4.24311e-05	4.87781
SPSB4	4.27343e-05	4.11826
NANOS3	4.50346e-05	4.00149
IGSF23	4.82154e-05	4.11989
MEIOB	4.88325e-05	4.56619
CLEC4D	4.97227e-05	2.45207
FEZF1	5.09382e-05	6.11786
SMPD3	5.13992e-05	2.26136
ENTHD1	5.3507e-05	6.60673
AFM	6.11113e-05	7.1417
CLDN4	6.28966e-05	5.35926
NYX	6.53775e-05	4.12112
KRT14	6.64603e-05	5.70015
GM7325	6.78513e-05	6.80604
CCR4	6.82461e-05	2.66599
A930041C12RIK	7.1689e-05	4.17664
CD226	7.40932e-05	2.80713
PFN4	7.53611e-05	4.83003
TRIM9	7.62048e-05	5.92412
LRGUK	7.93594e-05	5.67735
NECAB3	7.94462e-05	2.61718
TBX19	8.16756e-05	5.35541
PLXNA3	8.447e-05	2.0427
SHH	8.45733e-05	9.33624
ADGRB3	8.55086e-05	5.71529
HYDIN	9.61326e-05	7.19526
MIA	0.000109061	5.8939
CEP112	0.000111096	5.61233
CSMD2	0.000115079	3.86527
TAGLN3	0.000120217	3.75115
ARHGEF26	0.000121056	3.32125
POPDC3	0.000121951	6.7867
CDX2	0.000124068	6.00907
MORC1	0.000131402	4.18713
TRP63	0.000135269	2.58916
ITGA2	0.000136634	2.88475
TMEM150COS	0.000137637	4.15925
MIR8113	0.000145243	5.79583
DBN1	0.00014711	2.17318
KLF5	0.000148941	3.90178
RBPMS2	0.000152718	3.95854
2021-03-04	0.00015372	10.3823
LDLRAD4	0.000159403	1.80063
PPP1R1B	0.000163868	4.3938
LDHB	0.00016441	3.04976
UCP3	0.000168541	3.13625
1700067K01RIK	0.000173264	3.60441
ADCY1	0.000174007	3.37866
POLN	0.00018514	2.61515
ACTN2	0.000186035	5.13519
CNN1	0.000196308	4.98559
INSL5	0.000216587	5.70826
TMEM169	0.000218969	3.71828
MCF2L	0.000225721	2.27138
HCN1	0.00024387	8.89614
SNORD34	0.000246032	5.38418
PIPOX	0.000252285	2.67371
5330413P13RIK	0.000264662	5.47566
BEGAIN	0.000264902	2.76281
IGFBP2	0.000293618	3.51818
A730017C20RIK	0.000337389	4.99463
DCLK2	0.000340363	2.52328
OAZ3	0.000349766	3.77254
GM4371	0.000375004	4.10016
CHRNA1	0.000379276	7.04962
RXFP2	0.000391132	6.53125
PAX1	0.000397353	4.1706
IGF2OS	0.000419564	8.44613
TRPC7	0.000443336	6.42323
VTCN1	0.0004479	6.08147
CNGA1	0.000454962	3.08417
AI506816	0.000465315	6.38027
AHSG	0.000471126	2.75213
WNT8B	0.000484894	7.06316
BVES	0.000520827	7.12859
SALL4	0.000527868	6.97098
C2CD4D	0.000541314	5.54729
SLC28A1	0.000545722	4.4262
HIST1H2AG	0.000578162	4.23121
FAM26D	0.000578198	6.97837
RASL10B	0.000584599	4.2513
IGF2	0.000616937	4.72507
FERMT1	0.000641941	4.99842
PPP1R9A	0.000643169	3.441
LIX1	0.000686142	5.19827
TGFB2	0.000695985	2.88644
GM16793	0.000725234	3.76549
PLCH2	0.000754072	4.92274
SNX31	0.000783556	4.47215
SNORD57	0.000783692	5.11136
D630010B17RIK	0.000809087	3.9726
IFT80	0.000821056	2.05179
CNTN4	0.000825102	5.39304
FAM228B	0.000829276	3.82279
RPS6KA6	0.000847803	4.27716
FTHL17A	0.000873191	5.40082
OMD	0.000959438	3.06799
WNT7B	0.000996577	4.83474
MILL1	0.00105149	6.0683
GM20751	0.00106833	5.89753
NCAM1	0.00107862	3.33976
B230323A14RIK	0.00117761	5.32399
WDR27	0.00118097	5.75859
KCTD4	0.00123874	4.76629
OTOS	0.00125304	3.36768
5830416I19RIK	0.0012813	3.93981
TMEM30B	0.00128709	3.1331
ZFP995	0.00128999	2.07776
GIPC2	0.00129168	4.65184
LRRC46	0.00129909	5.10209
SLC5A9	0.00134212	5.96821
A730085K08RIK	0.00135938	5.32026
GM10941	0.00141127	5.323
SPINK2	0.00147222	4.80009
SYDE2	0.00148488	2.98699
9230102O04RIK	0.00148532	6.60615
AP3B2	0.00151791	4.14337
KCNIP1	0.00155777	5.01371
CLDN1	0.00157812	2.47865
CCNJL	0.00162865	4.72409
SPAG6L	0.0016963	5.49829
GM5122	0.00177796	4.82047
VMN2R84	0.001778	3.6056
KCNMB1	0.0018116	2.25073
COX6B2	0.00181584	3.067
SOX6	0.00181587	3.116
PPIL6	0.0018561	5.25605
9330102E08RIK	0.00190277	4.3766
CEP126	0.00191425	5.60874
FAT2	0.00200237	4.57517
MFAP3L	0.00204637	3.14492
PROM2	0.00205566	4.47301
GAP43	0.00205955	5.55275
REST	0.00215938	1.7282
ETS2	0.002165	2.77453
CRABP2	0.0021883	4.49543
1700001J11RIK	0.00223108	4.9735
TMEM158	0.00227618	2.24893
PERP	0.00234991	1.76445
D730001G18RIK	0.00240671	4.5834
ANKRD36	0.00251903	6.38209
CLDN34C1	0.00252504	3.40839
POMC	0.00255849	2.42782
CYM	0.00257255	5.39191
HRH3	0.00257255	4.569
SNORD87	0.00257432	3.41708
TMPRSS2	0.00258542	3.8378
FRS3OS	0.00263217	3.20906
IL2RA	0.00265338	4.01874
MUM1L1	0.00268545	5.77824
MIR3112	0.00269655	4.89068
BZRAP1	0.00271332	2.11115
1600029O15RIK	0.00272021	4.20329
FAM50B	0.00275468	5.99308
SUGCT	0.00283747	5.10238
DMGDH	0.00285284	5.50589
PTCH2	0.00285482	3.99883
4833418N02RIK	0.00291585	2.33027
MC1R	0.00295003	5.59147
ACOT6	0.00310359	2.36304
GM6961	0.00312386	7.25
MYO5C	0.00316227	3.48954
URAH	0.00316522	4.64966
CELA1	0.00319423	1.86079
SEZ6L	0.00335172	3.32869
E430016F16RIK	0.00337074	3.03088
PAQR8	0.00349915	2.15688
RAB40B	0.00355716	2.66405
RAI14	0.00356139	1.75011
P3H4	0.00358491	2.95074
MAP3K19	0.00366471	3.0136
HSPB3	0.00375271	5.76476
SFRP5	0.00392067	4.92467
PRDM16	0.00396029	2.62499
GM11538	0.00401031	3.60705
TNK2OS	0.00404569	2.12755
LRRC55	0.00404664	5.55414
PRSS8	0.00408767	3.1548
SCN2A	0.00420845	4.25631
PATL2	0.00423965	4.91469
SPRR1A	0.00430095	4.26939
RASSF8	0.00430301	2.92245
GM4432	0.00442968	2.4036
ADGRG1	0.00471189	2.17893
ZFP536	0.00475697	5.5588
TMEM200A	0.00484249	3.50307
TIGD4	0.00498302	6.4909
GJB1	0.00525863	5.44946
SLC6A7	0.00548198	2.87573
TPBG	0.00548893	2.97995
ICA1L	0.00564755	2.60261
GM11978	0.00569052	5.00871
CXCL5	0.00571371	4.05094
ZFP462	0.00573934	2.50551
TMC7	0.00578026	4.82753
MIR1306	0.00595848	5.41474
ST18	0.00617735	4.32962
4933413G19RIK	0.00627282	2.0023
LHFPL3	0.00653265	5.48099
NKD2	0.00671382	2.53266
LRRC66	0.00686591	4.87354
DSG1C	0.00696285	4.34858
PLET1	0.00726686	4.13015
MIR363	0.0072727	4.26796
PGBD5	0.00759533	3.10462
OLFR543	0.00762424	4.73622
DACH2	0.00767613	3.53752
MMP9	0.00769214	2.58301
ADGRG5	0.00792768	2.118
ALMS1-PS2	0.00800292	4.12837
DNAJC22	0.00811873	4.54958
INHBB	0.00819157	2.37116
MLF1	0.00823149	2.14065
NTRK3	0.00825434	2.68596
MICAL3	0.00825835	2.07605
OC90	0.00829894	5.02926
IL6	0.00835766	3.12518
GM4814	0.00842082	2.7979
CCNO	0.00844499	3.23563
PPM1E	0.00880107	2.15258
BC018473	0.00889342	4.97445
MSI1	0.00908396	4.16627
TMIGD3	0.00912867	4.33829
SYT14	0.0091567	5.09315
ZFP750	0.00931825	3.97711
SLC6A17	0.00937255	3.97802
MAL2	0.00943613	5.61237
DMKN	0.00954246	4.03896
PGR	0.00960519	4.33981
TAT	0.00991028	4.77736
HIST1H2BG	0.0101826	5.20425
UCHL1	0.0102554	1.85018
PDE5A	0.010267	2.64528
TDRP	0.0103024	1.3472
FSCN2	0.0103173	4.7056
NKX6-1	0.0104432	5.34001
CD200R3	0.0104649	4.75589
CRACR2A	0.0104662	2.06675
GM1821	0.0104981	5.39172
GM13830	0.0106314	4.37578
FRMD5	0.0109919	2.28709
PAX9	0.0112214	3.31639
GRHL2	0.0113111	5.58484
LRRC19	0.0114683	4.94795
ERH	0.0115094	4.08846
E330017L17RIK	0.011615	5.00788
SLC30A4	0.0117906	2.51073
PAX7	0.0118755	4.8757
TEX26	0.0120468	4.54107
GM10371	0.0121634	4.24383
HPSE2	0.0122313	5.13478
LOC215458	0.0124113	3.01689
TIMP1	0.0125662	1.82875
FOXA3	0.0126773	4.22233
SEL1L3	0.013167	3.72795
NUDT10	0.013321	5.00258
RUNX2	0.0138057	1.7549
GAPDH	0.0139446	2.97115
S100A3	0.0139806	4.00094
SPEF2	0.0140377	3.61476
RUBIE	0.0141774	4.1229
CEP85L	0.0143054	2.83196
GM10451	0.0143661	2.05819
PPM1L	0.0144826	2.14857
C430002N11RIK	0.0147534	3.16927
TERC	0.0148666	4.35427
GJB4	0.0150987	4.86352
LRRC10	0.0155643	3.20071
ATP6AP1L	0.0156032	5.81031
ASB17	0.0158197	4.66248
PTPRN	0.0159373	2.53658
FBXO15	0.0161906	3.97599
GPR12	0.0168348	5.01824
AW495222	0.0168934	4.63528
MIR142	0.0173969	4.47554
MED9OS	0.0175153	4.35414
GM10389	0.0175476	4.56896
MKRN2OS	0.0178555	3.37196
FBXO43	0.0179039	3.30512
SLC4A10	0.0181435	4.48295
PPP4R4	0.0183956	2.20272
MB21D2	0.018681	2.54895
RNF151	0.0187169	2.93644
WDR63	0.0196274	5.52297
VMN1R32	0.0197523	4.35836
KANK1	0.0198433	2.68934
1600002D24RIK	0.0200106	3.99912
ENOX1	0.0200194	2.03012
SSTR2	0.0202407	4.30562
LIPG	0.0205489	2.96613
MIR6948	0.0211726	4.53113
ADGRG3	0.0212929	1.60158
4930412O13RIK	0.0215283	2.38562
4833422M21RIK	0.0217432	4.09622
TNFSF15	0.0219594	3.09852
MIR6970	0.0224169	4.11176
MUC4	0.022482	4.30085
KCNS3	0.0229173	4.56486
H2-T3	0.02311	3.7667
FAM183B	0.023134	3.4352
FAM71F2	0.0231559	2.46908
SORCS3	0.0234022	4.47541
TEX19.2	0.0236792	4.35393
MIR5114	0.0238621	1.70092
ACOXL	0.0239765	2.56618
4930512J16RIK	0.0240873	4.70184
BNC1	0.0241175	4.4952
ITGB6	0.0245541	4.22758
COL10A1	0.0246253	4.49574
MOXD1	0.025203	2.38562
CXCL3	0.025382	4.19012
PROK2	0.0254378	4.60073
MSANTD3	0.0257636	1.67852
TDRD5	0.0260007	3.15629
1700003D09RIK	0.026829	3.99999
SNHG11	0.0269292	1.86517
TMPRSS3	0.0273188	4.23245
PSPN	0.0274365	2.34797
GAD1	0.0274445	3.54162
SEBOX	0.0277373	8.03366
SEMA3E	0.0277534	4.2677
OAF	0.0280326	1.99005
GM2061	0.0281591	5.05018
ZFP36L3	0.0285865	5.00309
SLIT1	0.029041	2.60646
HS6ST2	0.029091	1.77848
E330009J07RIK	0.0297666	2.15123
CDHR2	0.0309603	4.18555
CTF1	0.0310433	1.87869
RIMBP3	0.0311684	3.198
PLB1	0.03117	3.28517
COLGALT2	0.0314017	1.78397
XLR	0.0315742	2.90804
LRP11	0.0315828	1.5547
RHOV	0.0316187	2.83502
D630023F18RIK	0.0318797	4.29767
ETV5	0.0320807	1.62641
CRABP1	0.0320965	3.70295
LCA5L	0.0320965	3.04427
TBR1	0.0323696	4.32697
HIST1H2BA	0.0325011	3.64321
ZMAT4	0.0327545	4.91702
IL17D	0.0334199	3.68602
GPC3	0.0338984	1.93729
GPR4	0.0339437	1.3895
EFNA2	0.0339595	1.73756
GZMC	0.0339938	2.83922
SNORD1B	0.0341022	4.1232
COL19A1	0.034476	3.72292
MKX	0.0349868	4.50613
TTC25	0.0351333	3.23158
SRSF12	0.035203	1.85055
D630003M21RIK	0.0352586	3.1359
LYPD1	0.0354206	2.02374
4930474N09RIK	0.0356002	4.79742
LRP2	0.0366529	3.19315
4930478L05RIK	0.0366647	3.11534
GM525	0.0370351	3.73682
TFCP2L1	0.0378337	2.06539
LNCENC1	0.0379881	3.57419
CAPS2	0.0383002	5.12328
MPPED2	0.0383117	4.20329
FOXA1	0.0384335	3.47658
KRT8	0.0385346	2.12349
NRXN3	0.0389348	4.21415
PLA2G2F	0.0389424	4.30671
HRG	0.0391191	5.15438
GAREML	0.0392971	4.24059
BC030499	0.0394901	1.97904
DIO2	0.0396547	2.03799
SMOC2	0.0401398	1.61424
ARRDC5	0.0402908	4.16365
GM7457	0.0408882	4.12481
MASP1	0.0408979	4.96865
NKX2-2	0.0412335	6.0339
WISP3	0.0424221	2.18935
BEX2	0.0425206	2.63292
1700001P01RIK	0.0433009	2.82047
ZFP389	0.0435438	3.06102
ARPP21	0.04392	2.63687
LMAN1L	0.0444047	4.41448
KRT23	0.0446882	3.46873
CCK	0.0447141	4.39698
FGF13	0.0447141	2.33141
GM5176	0.0452561	2.26294
2410017I17RIK	0.0452605	5.05983
MACROD2	0.0458643	1.88284
GPR39	0.0478222	1.74716
MFI2	0.0489915	2.94501
TLX2	0.0491518	2.69629
GM1943	0.04918	1.92798
CDKN1C	0.0497631	1.54449
RLBP1	0.0498394	4.44543
1810006J02RIK	0.0498394	-4.08952
ORM3	0.0498381	-4.3951
1810010D01RIK	0.0497858	-4.43387
HIST2H2AB	0.0497169	-3.75726
TCTE2	0.049435	-4.17437
MMD2	0.048881	-5.08179
RANBP3L	0.0485738	-4.39406
NCAN	0.0482856	-5.19136
NLRP1C-PS	0.0475362	-4.66841
ASXL3	0.0472542	-4.37136
DHH	0.046831	-2.37792
ACSL6	0.0468036	-2.88899
HEY2	0.0462701	-3.5578
SLC4A5	0.0462465	-4.39419
CCDC36	0.046238	-2.64669
KCNH1	0.0460441	-2.20758
TMPRSS11E	0.0458803	-2.27116
CCL3	0.0458605	-1.76742
HSD17B1	0.0456077	-2.92341
PLIN1	0.0456077	-2.97156
TEKT2	0.0451817	-2.15129
A230065H16RIK	0.0451634	-4.13782
OPCML	0.0448549	-3.32672
1700003E16RIK	0.0447518	-5.16513
DPYS	0.0443499	-4.62576
FAM171B	0.0434427	-2.51602
CD209E	0.0431442	-3.9823
SLC23A3	0.0430593	-3.87298
NEUROD4	0.0428136	-4.87811
PTHLH	0.0425911	-2.91715
WNT3	0.0424221	-4.10855
FGF16	0.0422976	-3.42954
KCNH7	0.0415794	-5.54092
ARL9	0.0412017	-5.01031
GM14379	0.0410363	-3.83044
OSBP2	0.0407945	-3.37975
NRG1	0.0407317	-3.67788
LRRC6	0.0403431	-3.9302
TMEM266	0.0403063	-3.57475
MORN3	0.0400672	-3.5678
DNMT3L	0.039323	-3.87865
GM14326	0.0391422	-2.68658
DLGAP3	0.0389067	-2.34351
RHO	0.0383944	-4.63357
SMAD9	0.0381396	-3.68149
9530062K07RIK	0.0380637	-3.43357
IFI27L2B	0.0379953	-4.29734
C230024C17RIK	0.0377113	-4.90958
GM4759	0.0375545	-5.99808
CSRP3	0.0372917	-4.99666
TEX35	0.0368092	-2.37141
ADAM3	0.0367421	-5.15622
DNAIC1	0.0367421	-4.50017
GUCA2B	0.0367421	-3.93449
NECAB1	0.0366836	-2.7244
KCNA7	0.0366261	-3.81308
HHIPL1	0.0364823	-2.93221
FMN2	0.0362215	-4.37532
BCO1	0.0359483	-3.96966
CD209C	0.0357743	-4.7128
E130310I04RIK	0.0355962	-4.24414
RPH3A	0.0355127	-4.05398
ST6GALNAC5	0.0354804	-2.88709
KLK4	0.0351861	-3.92632
LMOD2	0.034618	-5.06447
CFI	0.0345455	-2.18482
9930111J21RIK1	0.0345273	-3.56865
GALR3	0.0343299	-5.08158
SLN	0.0340096	-6.85228
CEBPE	0.0336353	-4.0403
4921511I17RIK	0.033461	-3.20055
UPK1A	0.033284	-2.00621
TRHR2	0.0330972	-4.66623
GM10584	0.0326988	-2.77107
1700110K17RIK	0.0325089	-4.78282
GM26839	0.032423	-3.75668
TDO2	0.0321043	-4.30003
GGT6	0.0320359	-2.85535
1110046J04RIK	0.031857	-2.99417
APOL9A	0.0312511	-2.88022
GM9899	0.0311167	-5.11057
CDH9	0.0308651	-4.33418
RFLNA	0.0300907	-3.78361
GDNF	0.029971	-4.2716
SDK2	0.0297755	-4.78096
MLPH	0.0295501	-3.59341
TRIM34B	0.0294679	-5.88936
GCG	0.0293026	-4.87829
PHACTR3	0.0291656	-3.42603
ANXA10	0.029163	-4.56627
TMEM150B	0.0291527	-1.77742
INSM1	0.0288857	-2.9739
4930509E16RIK	0.0285865	-4.57459
SLC25A31	0.0282942	-5.33388
OLFR1444	0.0282761	-4.40909
REP15	0.0282417	-5.00152
NTNG1	0.0281802	-2.8286
TACR3	0.0280179	-3.6912
SSTR1	0.0278847	-4.882
PIRA4	0.0278014	-2.81254
PIRA7	0.0278014	-2.81254
HBB-BH1	0.0275573	-4.37255
SCNN1B	0.0275573	-4.2695
DUSP13	0.026983	-4.50682
DNAIC2	0.0266694	-3.88411
CLDN6	0.0266453	-4.41721
HGF	0.0262925	-2.0056
OTOF	0.0255339	-3.82625
ARXES1	0.0255256	-4.58588
REG3G	0.0250922	-2.54892
GBP2B	0.0250775	-3.63886
GPRIN3	0.0248154	-5.46743
SLC24A2	0.0246834	-5.32743
RLN3	0.0238682	-3.54126
IL1BOS	0.0238621	-5.05744
DMRTA1	0.0235621	-3.67007
C7	0.0234913	-3.2474
P2RX6	0.0234848	-2.14551
KLK1B27	0.023387	-4.70355
GABRR1	0.023381	-3.73567
CES2C	0.0232596	-3.5443
XYLT1	0.0231335	-2.85726
TMEM117	0.0225685	-4.10125
0610043K17RIK	0.0221675	-5.12814
KCNK7	0.021906	-2.92198
CFAP45	0.0216521	-3.04703
CYP17A1	0.0216265	-4.67982
CATIP	0.0215331	-2.42618
ITGB2L	0.0213929	-3.8152
PRSS29	0.0213219	-4.71651
GM4926	0.0212572	-4.74944
4933407L21RIK	0.0210155	-2.90428
COL26A1	0.0209741	-2.73289
CEACAM19	0.0208143	-4.61492
LINGO2	0.0200544	-4.29224
TMEM178	0.0198836	-3.02698
4933439K11RIK	0.0197869	-4.39287
SLC17A6	0.0197192	-5.1239
GM11413	0.0196967	-5.45471
PAPLN	0.0192516	-2.41077
SLC36A2	0.0190678	-4.05278
PPM1N	0.0190159	-3.06119
SERPINA12	0.0190152	-4.72701
AREG	0.0189932	-4.29599
MYOM2	0.0188818	-3.94866
1300017J02RIK	0.0188609	-3.44152
GM17757	0.018603	-5.74406
GM18853	0.018603	-5.74406
WFDC2	0.0182689	-4.29701
OLFM4	0.018245	-3.96782
CNGA3	0.0182185	-4.65414
NODAL	0.0181644	-3.36679
NRIP3	0.0179066	-4.08468
H1FOO	0.0177998	-4.86299
PRKD1	0.0174332	-2.40002
GM9920	0.0171519	-5.30319
CCL4	0.0171404	-2.2445
8430426J06RIK	0.0171201	-4.99473
MYBPHL	0.0170358	-5.6609
PLEK2	0.0170219	-2.9472
RAB11FIP4OS1	0.0169338	-4.07538
PKD2L1	0.0167878	-4.64487
KCNG2	0.0167081	-2.79323
MATN1	0.0166439	-4.41341
PCDHB11	0.0163378	-3.40506
IGFALS	0.0162428	-2.87299
CTSG	0.0161059	-3.71969
CD207	0.0160716	-2.89778
IFIT1BL2	0.0159544	-3.19416
F630111L10RIK	0.0156823	-4.36998
TAC4	0.0155411	-4.24081
ALDH3A1	0.0155297	-2.4189
IRS3	0.0154103	-4.50315
OOEP	0.0152235	-4.70392
TCP11X2	0.0150394	-4.99222
MYOZ1	0.01467	-5.08937
PCNX2	0.0146084	-2.78433
LILRA6	0.0144167	-2.6261
MS4A2	0.0142929	-5.30157
GM128	0.0141375	-4.66967
HOXA6	0.0140664	-5.73694
SLC2A12	0.0139254	-4.82993
HOXA9	0.0139028	-5.30233
VAT1L	0.0138741	-3.99232
FAM162B	0.0136919	-5.51779
TMEM132C	0.0134783	-4.89693
IRX2	0.0134635	-4.41326
P4HA3	0.0134286	-1.93388
SLC12A3	0.0133923	-4.44392
DMC1	0.0132597	-3.0462
CYP2U1	0.0132296	-3.00973
GULO	0.0131917	-4.16664
9630028I04RIK	0.0129558	-2.30802
GC	0.0126673	-4.98433
CYTL1	0.01242	-5.42475
GPR33	0.0123409	-3.6534
WASF3	0.0121767	-4.96111
GM15698	0.012158	-6.20786
SLC16A11	0.0120004	-2.12138
CYP4F39	0.0119992	-3.87638
1500015O10RIK	0.0119543	-4.0952
FRMD3	0.011708	-4.49546
GRIP2	0.0115713	-3.75313
ATP4A	0.0111371	-3.83109
ADGRF3	0.0107514	-3.78853
GM867	0.0107154	-4.20937
KLRB1B	0.0106617	-2.36006
HOXB6	0.0104662	-3.03978
F730043M19RIK	0.0104607	-2.62078
OPRD1	0.010453	-4.91097
KCNG3	0.0100536	-4.57932
SLC35F3	0.0098211	-3.55813
2610016A17RIK	0.00961623	-4.45018
GLB1L2	0.00959584	-3.38378
TMEFF1	0.00958531	-2.44931
BFSP1	0.00948416	-3.13142
PRTN3	0.00945699	-2.67724
LTF	0.00940364	-4.17281
TMEM45B	0.00935507	-3.63967
MFSD4B3	0.00910756	-4.41688
5430437J10RIK	0.00908823	-2.92785
NAALADL2	0.0090592	-2.40707
PCDHB13	0.00902185	-4.15155
CECR6	0.00892936	-4.67037
FBXO39	0.00880204	-5.13613
TERB1	0.00868311	-5.68387
NXNL2	0.00846402	-3.71798
GM8013	0.00844798	-4.45323
FAM3B	0.00832066	-4.58247
CCL24	0.00831713	-2.78095
ASB10	0.00826504	-4.82654
LRRC36	0.00814214	-3.9427
G630025P09RIK	0.00811624	-3.15397
REC114	0.00810869	-3.28897
KCNG1	0.00808743	-5.40494
2700054A10RIK	0.0078507	-4.93754
CDSN	0.00762424	-4.22455
PPEF2	0.00761636	-5.32116
FAM89A	0.00760501	-2.00271
CXXC4	0.00752781	-3.5283
OASL1	0.00750048	-2.16582
TMIE	0.00729555	-3.80945
PLEKHS1	0.00728024	-3.47306
SNCA	0.00715931	-3.11567
TMEM102	0.00708741	-3.01403
TDRD1	0.00708224	-4.94586
GM8773	0.00703175	-3.45363
6330409D20RIK	0.00700829	-2.94723
SCT	0.00698748	-5.39753
ENAM	0.00690517	-5.84174
2900011O08RIK	0.00674204	-5.3304
ARHGEF16	0.0066754	-2.03341
LRRC75B	0.00665504	-4.09266
CLDND2	0.00664033	-5.87353
PRSS33	0.00659966	-5.57532
PTPRR	0.00659784	-4.77444
TMEM132E	0.00657567	-5.37609
RASD2	0.00653265	-2.55615
FAM209	0.00648504	-2.6052
SYTL4	0.00643779	-2.99121
PITPNM3	0.00636817	-4.25455
4930562C15RIK	0.00624779	-4.66717
TTPA	0.00624349	-5.07495
GM9054	0.00622325	-4.16473
GM11266	0.00606803	-4.00358
VWDE	0.0060159	-6.26177
MYRIP	0.0059845	-4.47341
CSDC2	0.00591723	-2.33741
HOGA1	0.00590397	-3.24901
ADRB1	0.00589376	-2.22083
HPX	0.00582194	-4.91993
HAMP	0.00576564	-5.47924
INPP5J	0.00569756	-5.48583
MAGEE2	0.00568405	-3.91427
1110002J07RIK	0.00559571	-3.08028
CAMP	0.00549616	-3.31349
3300002P13RIK	0.00541053	-4.88535
OLFR1372-PS1	0.00539271	-2.95189
UTF1	0.00531771	-4.47207
5930412G12RIK	0.00523811	-4.77607
CABP4	0.00521906	-3.04643
AOX4	0.00520002	-4.92753
GPR156	0.0051809	-5.36293
TNFAIP6	0.00516146	-4.93764
ALDH1A7	0.0051565	-5.77504
SERPINA1D	0.00505242	-6.40077
9030404E10RIK	0.00488857	-5.85868
OLFR98	0.00488693	-5.44589
GRIK4	0.00486477	-2.97444
TECTB	0.00483256	-5.14827
1700029M20RIK	0.00481048	-5.58624
PIRA6	0.00477462	-2.9386
GM5086	0.0047725	-2.7591
F10	0.00476869	-2.02465
PDYN	0.00471092	-4.14448
CIDEC	0.00469491	-3.52972
S100A9	0.00464011	-2.80842
FGF10	0.00454339	-5.0458
ALDH3B2	0.0045125	-4.38535
FAM187B	0.00447543	-3.39049
CLEC4G	0.00440187	-6.03083
1700016K19RIK	0.0043767	-4.80979
AOX1	0.00431553	-3.32563
GSTT4	0.00413517	-5.01785
LPAR3	0.00408767	-2.50145
ANKUB1	0.00396972	-5.52009
SLC34A1	0.00396498	-5.78339
TDGF1	0.00393343	-4.65286
GNGT2	0.0039259	-2.41175
TMEM171	0.00385298	-2.83889
NXPH4	0.00384958	-4.99397
GM15972	0.0037977	-5.28356
KLRA12	0.00368753	-4.75777
C2CD4B	0.00368449	-4.88033
RETN	0.00361646	-3.77284
TTC6	0.00361094	-3.56194
GLT1D1	0.00358157	-5.56892
FFAR3	0.00354967	-5.24247
MYO18B	0.00347678	-5.4777
KDF1	0.00346565	-2.95398
A830082K12RIK	0.00341576	-5.3742
GALNT14	0.00335974	-4.75874
TRIM10	0.00332479	-5.21365
9530080O11RIK	0.00326516	-5.27689
LOR	0.00322875	-4.30203
LY6G6E	0.00322175	-5.53275
ITGB8	0.00322053	-6.23573
ADM2	0.00312652	-5.46476
GCHFR	0.00302852	-4.96592
CDHR5	0.00298911	-5.43595
HCAR2	0.00298674	-2.86082
A530016L24RIK	0.00298388	-4.2236
PRSS2	0.00292384	-5.60446
CD209D	0.00290172	-3.9775
TEKT4	0.00289434	-5.59768
ADIG	0.00288848	-4.52414
4930578C19RIK	0.0028252	-3.048
FAM110B	0.0028161	-3.59182
3300005D01RIK	0.00278095	-3.91949
SHROOM1	0.0027431	-3.26422
SERPINB10	0.00267668	-3.05743
BRINP2	0.00264812	-5.09594
5730488B01RIK	0.00264317	-5.7621
1700016G22RIK	0.00262076	-5.48167
KLRB1C	0.00261886	-2.8148
BTNL6	0.00258863	-2.86203
PDZK1IP1	0.00258546	-5.03553
PPARGC1A	0.00252192	-5.7987
F9	0.00248263	-3.48932
PTK6	0.00247604	-5.16317
RIMS2	0.0024575	-5.86523
MSTN	0.00245496	-5.02354
NCCRP1	0.00245183	-2.7405
KCNH4	0.00244149	-3.67314
SNHG14	0.00240964	-3.66906
CACNG8	0.00234991	-4.91103
TNNI2	0.00228596	-2.97244
4933422A05RIK	0.00227244	-5.33566
NKPD1	0.00226291	-4.57625
EBF4	0.00222039	-5.54491
GM8817	0.00220237	-4.64464
RSPO3	0.00213831	-4.57015
KCNN3	0.00212007	-4.73554
GNAT1	0.00209466	-5.01198
PRKG2	0.00199985	-3.0005
MYH3	0.001938	-3.40366
CADPS2	0.00193481	-3.10782
SECTM1A	0.00191425	-2.87193
ZFP939	0.00189876	-2.97181
ERBB3	0.00185211	-2.65003
NAIP1	0.0018417	-3.45974
FUT7	0.00184052	-2.52483
GM10532	0.00183181	-5.10526
SERPINA9	0.00182782	-5.93969
CAPSL	0.00180623	-3.60483
IFITM10	0.00180581	-2.50923
IL1B	0.00178516	-3.81704
GLP2R	0.00176779	-6.30864
PTPRN2	0.00176291	-4.78984
SCG5	0.00172851	-5.00051
H2-M5	0.00171118	-3.49218
GPR85	0.00170929	-3.17199
PRSS34	0.00169713	-5.48732
ATP2B2	0.0016963	-3.88692
BMX	0.00166711	-5.31339
OBSCN	0.00162407	-4.6051
FHAD1	0.00162378	-2.61221
LRTM2	0.00158956	-4.79996
PIWIL4	0.00156029	-4.39815
TTLL9	0.00149388	-4.22316
GM17455	0.00144879	-5.77975
GYPA	0.00143282	-6.17106
TMEM255B	0.00140849	-5.42364
ZFP13	0.00140771	-3.41308
B230217C12RIK	0.00139724	-2.73859
ALAS2	0.00139019	-2.60048
CLCA3A2	0.00137936	-4.87295
TMEM56	0.00133877	-5.8777
A730020E08RIK	0.00129082	-3.85736
RSAD2	0.00127432	-2.38777
NPPA	0.00121028	-5.17037
ADAM23	0.00115949	-2.69086
GPR152	0.00114704	-3.03547
ART2A-PS	0.00113352	-3.70426
SPATA19	0.00112736	-5.71658
DNAH7A	0.00112369	-5.84448
MYH7	0.00109974	-6.55233
DMTN	0.00106074	-2.93775
NPHS1	0.00104075	-5.62499
SMIM5	0.000982685	-2.95722
FCAMR	0.000974063	-5.82475
SNURF	0.000965378	-3.28056
TTBK1	0.000960038	-3.63762
LRAT	0.000930805	-3.35952
9430069I07RIK	0.000902857	-6.34161
E130102H24RIK	0.000873111	-3.34169
MYL7	0.000857025	-5.97921
FNDC5	0.000852503	-3.52321
SHOX2	0.000852503	-5.31487
4933432I03RIK	0.000840794	-5.75017
OLFR157	0.000838267	-5.73124
GPAT2	0.000830844	-3.72322
CAR3	0.000825361	-3.87757
IL13RA2	0.000775923	-3.35858
MAP10	0.0007424	-2.42891
DCAF12L2	0.000737231	-4.54436
EPM2A	0.00072797	-4.64567
HMGCLL1	0.000726465	-5.85338
DPYD	0.000715813	-2.78013
SCN3A	0.000712135	-4.95967
SCGB3A1	0.000669598	-3.73043
GUCY2G	0.000652632	-4.18985
RYR2	0.000650946	-4.79756
CAR1	0.00059568	-6.39685
THRSP	0.000573336	-4.30061
SCGB1A1	0.000556364	-7.18213
AW551984	0.000550416	-3.48419
ELANE	0.00054809	-5.61852
1600010M07RIK	0.000543617	-3.31117
SLC52A3	0.000532496	-2.88498
CSF3R	0.000472319	-2.43295
PRSS30	0.000471925	-2.76981
RASSF10	0.000460128	-5.2036
TEX11	0.000452662	-5.38756
IZUMO1	0.000439025	-6.25805
AQP3	0.000434847	-5.71474
SYT1	0.000428836	-5.25763
GM11837	0.00042871	-5.97373
ART2B	0.000419136	-4.65926
OAS1G	0.000418491	-4.62066
NMNAT2	0.000410524	-5.94783
FAM196B	0.000396314	-6.10238
SYNA	0.000392588	-5.61348
DPYSL5	0.000388686	-5.86359
GM1965	0.000383826	-4.7108
LIPO2	0.000377022	-6.17917
KCTD19	0.000376054	-5.81034
KLHL14	0.00035899	-4.88162
CYP2J9	0.000337659	-3.24007
CDH4	0.000326095	-5.57149
ZDHHC23	0.000306502	-5.69995
ADGRL3	0.000304889	-6.12152
ECEL1	0.000303506	-4.02131
PABPN1L	0.000283508	-5.71117
A330074K22RIK	0.000280262	-5.85375
GBP10	0.000277307	-2.98469
PLCB4	0.00027668	-2.71717
FABP1	0.00026617	-5.32722
PHKG1	0.000264694	-3.59942
2610528A11RIK	0.000243623	-4.7033
MS4A4C	0.000242657	-3.71032
H2AFY3	0.000239475	-5.37139
OIT1	0.000234193	-4.41121
IGSF11	0.000231995	-6.38327
CD70	0.000214204	-6.66597
HES5	0.000214204	-5.90727
F930015N05RIK	0.000210432	-4.57749
9430078K24RIK	0.000207107	-5.77195
HBB-B1	0.000206472	-3.45446
HBB-BS	0.000206472	-3.45446
FOXF2	0.000203558	-5.01132
TMPRSS13	0.000200601	-3.84426
HBB-B2	0.000197534	-4.18934
HBB-BT	0.000197534	-4.18934
PIRA2	0.000177514	-4.13341
HAVCR1	0.000168507	-6.43984
1700040L02RIK	0.000161019	-5.62596
MYBPH	0.000160715	-5.09158
RGS8	0.000156896	-6.36972
FUT2	0.000150589	-5.7704
FXYD1	0.000149384	-3.58834
HSF2BP	0.000145687	-4.01019
LRRC18	0.000145228	-3.66834
ITGA8	0.000143867	-3.74889
ZFP976	0.000141927	-2.90377
CFD	0.000140648	-4.01649
PLCD3	0.000135857	-3.3209
GAPT	0.000128986	-3.88586
CACNB2	0.000120898	-7.27032
1810041L15RIK	0.00011791	-6.07757
TIFAB	0.000117799	-2.74958
NDST3	0.000117683	-6.57181
4922502D21RIK	0.000116366	-6.93355
CLSTN2	0.000113148	-6.0364
ADORA1	0.000110804	-6.02378
ADAMDEC1	0.000110643	-5.1383
B3GALT1	0.000104085	-4.46752
RALYL	0.000102135	-7.17826
A230072E10RIK	0.000102014	-3.62648
LAMA1	0.000101066	-5.034
NIPAL4	9.85614e-05	-5.92276
HAS2	9.43241e-05	-3.52373
IP6K3	9.24069e-05	-4.86003
CHRNA10	9.01527e-05	-3.27545
2900041M22RIK	8.9317e-05	-3.96616
CYP2F2	8.88383e-05	-6.57115
TARM1	8.69788e-05	-5.85247
SERPINB7	8.35524e-05	-6.28884
GRM6	8.31743e-05	-5.30992
SMIM10L2A	8.26547e-05	-4.71501
VSIG2	7.94891e-05	-5.24429
ANO4	7.93483e-05	-6.49581
CCDC67	7.90204e-05	-6.39785
ZAN	7.79385e-05	-3.24307
CYP2E1	7.71807e-05	-4.95997
SEC14L2	7.56386e-05	-4.09359
HBA-A1	7.4103e-05	-3.53455
HBA-A2	7.4103e-05	-3.53455
COL6A4	6.8987e-05	-4.80598
CHIL3	6.89512e-05	-3.14886
TOX3	6.89301e-05	-5.4699
EYA1	6.78852e-05	-3.80154
CES1D	6.67265e-05	-6.37125
SSTR3	6.63479e-05	-6.97924
ONECUT2	6.35974e-05	-6.39361
KCNS1	6.32692e-05	-7.80797
RAB17	5.99362e-05	-3.82565
IPCEF1	5.57792e-05	-3.8536
DYRK4	5.37556e-05	-4.99104
COCH	5.21514e-05	-5.87732
FGFR4	5.01997e-05	-6.40142
B3GNT3	4.79165e-05	-2.6069
4632428C04RIK	4.70309e-05	-5.26406
NXPH1	4.51916e-05	-6.94351
NGP	4.48582e-05	-5.35932
4930426D05RIK	4.39331e-05	-4.94268
GPR15	4.30125e-05	-5.14644
LY6G	4.04301e-05	-6.01611
PTGFR	3.92479e-05	-6.99532
TCERG1L	3.90956e-05	-6.29141
AMPH	3.83978e-05	-3.69575
RXRG	3.79936e-05	-6.92109
PVALB	3.71094e-05	-6.83336
KBTBD12	3.54509e-05	-6.42835
CRYBB1	3.42281e-05	-5.81403
TRIM30B	3.38652e-05	-4.03881
NXNL1	3.23399e-05	-6.31086
ADAM6B	3.23173e-05	-4.59785
CHRNB4	3.04406e-05	-4.94023
VNN3	2.96734e-05	-2.90534
SNTB1	2.74065e-05	-5.07743
FAM217B	2.50851e-05	-3.24546
PCP4L1	2.41529e-05	-6.04909
RTN2	2.30146e-05	-3.53206
ADAMTS13	2.29894e-05	-6.66673
NTS	2.29852e-05	-4.93144
MPO	2.2283e-05	-4.89435
CYP4B1	1.99948e-05	-3.12159
SCG2	1.84256e-05	-6.25523
SNPH	1.80108e-05	-6.35143
CORIN	1.78065e-05	-6.28376
CDH26	1.76588e-05	-6.27737
PLA2G5	1.69627e-05	-6.50353
ELMOD1	1.60461e-05	-5.05069
ALOX15	1.58723e-05	-4.30697
ZFP366	1.5565e-05	-3.88187
SERPINA1E	1.39484e-05	-5.42449
OOSP2	1.28216e-05	-7.71277
KLF12	1.23626e-05	-4.29081
TBX1	1.20846e-05	-8.24857
FBXO2	1.18306e-05	-4.45157
FIGN	1.17761e-05	-4.71194
ALPK2	1.1746e-05	-5.20485
ABCA13	1.11413e-05	-7.38217
MAOB	1.04638e-05	-6.37443
SLC45A3	1.023e-05	-2.94284
ARFGEF3	9.61417e-06	-6.83521
F13B	9.3787e-06	-7.16391
CHST4	8.76418e-06	-7.17356
KDM4D	8.53331e-06	-6.75821
BTNL1	8.4391e-06	-6.59106
LYVE1	8.40398e-06	-4.63218
ISPD	8.35302e-06	-4.08924
RTP3	8.18145e-06	-6.55793
TNN	8.14792e-06	-7.23608
SCN11A	8.11038e-06	-5.08246
ADTRP	7.22604e-06	-7.10876
DAB1	6.99634e-06	-6.90097
GUCY1B2	6.65726e-06	-4.5332
CLEC3B	6.03959e-06	-2.9774
SIGLECH	6.02219e-06	-4.54726
IL1R2	5.85469e-06	-4.24828
CILP2	5.7497e-06	-5.58342
IFIT3B	5.66735e-06	-3.95704
PHF24	5.56293e-06	-6.80214
BICD1	5.47934e-06	-2.9809
ITGA1	5.28076e-06	-2.28372
IL22RA2	4.77178e-06	-6.84575
5033406O09RIK	4.48772e-06	-3.66347
PTCHD1	4.30001e-06	-4.08357
SLC4A1	4.20491e-06	-8.14842
PALM3	4.18137e-06	-2.80555
RGS13	3.96222e-06	-6.51856
FAM19A3	3.72484e-06	-7.13247
GM4070	3.66729e-06	-5.04887
GVIN1	3.66729e-06	-5.04887
CHST8	3.58889e-06	-6.35897
CD209B	3.31194e-06	-7.91393
GDF3	3.09543e-06	-3.22313
DNAH6	3.07905e-06	-3.50099
KCTD14	2.98968e-06	-3.95203
DGKG	2.90799e-06	-2.84545
RETNLG	2.7641e-06	-7.12542
SCG3	2.54093e-06	-6.99829
CALCR	2.50848e-06	-7.47673
EDN3	2.48274e-06	-6.82862
CXCL11	2.45154e-06	-7.11665
GM11992	2.28402e-06	-5.46352
EHF	2.24277e-06	-3.03097
CEMIP	2.18341e-06	-3.822
TMEM63C	2.09614e-06	-6.65851
MMRN1	1.91515e-06	-4.52193
CLDN13	1.83329e-06	-7.143
B3GALT5	1.71364e-06	-3.86038
OLFR56	1.69852e-06	-4.52959
KIRREL3	1.57872e-06	-6.82059
ARHGAP36	1.48604e-06	-7.77012
CDH17	1.48385e-06	-3.3522
ESRRG	1.42487e-06	-6.83345
NUGGC	1.42208e-06	-7.0859
0610039H22RIK	1.37625e-06	-4.56753
CDHR1	1.33886e-06	-6.91837
PON3	1.26904e-06	-3.88585
BTNL5-PS	1.25601e-06	-7.05238
BMP3	1.24648e-06	-5.38068
GM5535	1.19317e-06	-9.02021
STUM	1.18913e-06	-5.02855
SNTG2	1.17729e-06	-7.03853
RAB39B	1.11812e-06	-3.40177
CLDN11	1.11258e-06	-6.43784
C130026I21RIK	1.0734e-06	-4.90235
M1AP	1.04673e-06	-3.14878
ZFP334	1.02801e-06	-4.27548
PAK6	9.99417e-07	-7.1129
GM5431	9.64709e-07	-4.3682
GM6093	9.29217e-07	-7.49443
GATA2	8.93619e-07	-3.56509
CPNE4	8.83581e-07	-7.13519
CLCA3A1	7.84636e-07	-3.74589
MAP6	7.83536e-07	-3.27878
EPHX3	7.39065e-07	-3.60053
MIRA	7.19077e-07	-6.13102
RAI2	6.76965e-07	-6.82247
S100A8	6.73534e-07	-3.06236
TNNT3	6.35899e-07	-6.55603
ASTN1	6.04577e-07	-7.56856
IFNLR1	5.8819e-07	-3.19653
TM4SF5	5.87906e-07	-5.58562
BTN2A2	5.87776e-07	-7.1628
CXCR2	5.82532e-07	-5.88233
PPP1R3D	5.77613e-07	-3.57668
TKTL1	5.10284e-07	-7.55529
FGF23	4.93816e-07	-4.40618
ITIH3	4.83096e-07	-5.87457
PRG3	4.692e-07	-8.16292
HS3ST3A1	4.64715e-07	-3.89994
TBX21	4.60091e-07	-4.27857
HOXD9	4.43416e-07	-4.80119
SERPINA3H	4.41626e-07	-4.66964
KCNK5	3.38007e-07	-3.85837
SPAG6	3.28121e-07	-5.13474
CSPG5	3.14235e-07	-4.29439
FAM65C	3.04228e-07	-4.50454
TMOD2	2.84733e-07	-4.01952
TLR5	2.83848e-07	-7.04666
PDLIM3	2.53078e-07	-4.61183
OAS3	2.20804e-07	-3.81001
CHAC1	2.17368e-07	-4.5546
MT3	2.00987e-07	-4.67424
CLDN7	1.95211e-07	-4.2045
MADCAM1	1.90915e-07	-5.74061
COLEC11	1.87635e-07	-4.59503
THBS4	1.77787e-07	-3.27229
NRGN	1.67987e-07	-3.13678
UPB1	1.55439e-07	-3.98091
APOL6	1.49897e-07	-4.95462
BPIFB4	1.42399e-07	-7.90657
METTL21B	1.32435e-07	-6.53445
TGFA	1.11829e-07	-4.45642
SPNS3	1.04906e-07	-6.66606
NR2F1	9.53697e-08	-3.40347
IFIT3	8.1127e-08	-3.46233
GALNT9	7.62919e-08	-4.99451
GCNT2	7.51081e-08	-3.04265
GPR55	6.58926e-08	-4.81242
LY6I	6.052e-08	-4.48057
1700019D03RIK	5.8631e-08	-7.61422
SRMS	5.77904e-08	-6.22374
CRYBA4	5.76022e-08	-4.53495
ZCCHC3	5.5172e-08	-4.80943
KLF15	5.41911e-08	-4.15171
CACNG6	5.33992e-08	-7.91187
TMEM221	5.15335e-08	-3.86092
ARHGAP8	4.26888e-08	-3.88077
TGFBI	3.68059e-08	-3.31577
SLC22A3	3.35261e-08	-3.94822
CST7	2.8251e-08	-4.61457
PRRG4	2.72433e-08	-5.22473
DGKK	2.58905e-08	-5.2505
IRF7	2.539e-08	-4.41572
FUT1	2.50089e-08	-4.79578
CX3CR1	2.33933e-08	-3.30874
SLPI	2.29708e-08	-6.21719
MIR5107	2.18955e-08	-3.50532
FRZB	1.79499e-08	-3.82139
ADH1	1.695e-08	-3.80728
IL1RL1	1.66966e-08	-4.35919
ISG15	1.59925e-08	-3.5255
OOSP1	1.41522e-08	-7.08671
TACR1	1.37497e-08	-7.30035
GPR18	1.33048e-08	-4.39562
SH3RF2	1.30314e-08	-5.61284
LARP6	1.28346e-08	-3.48883
FAM81A	1.28228e-08	-4.7607
PARM1	1.07422e-08	-2.8466
MUSTN1	1.03991e-08	-3.34382
CCNB1IP1	1.00674e-08	-6.50137
CCL5	9.98257e-09	-4.74848
TPSG1	9.77973e-09	-7.1631
A630023P12RIK	9.34245e-09	-5.79943
MLC1	9.04441e-09	-8.0827
ACSBG1	8.49941e-09	-3.36494
S1PR5	8.42515e-09	-5.2483
4933404K13RIK	7.55636e-09	-7.48689
FENDRR	7.45854e-09	-8.12112
OAS2	7.45144e-09	-3.69819
MYO16	7.43018e-09	-7.78173
SH2D4A	7.20765e-09	-4.0742
GM2663	7.0562e-09	-8.55521
LTA	6.52276e-09	-4.36743
4930431P03RIK	5.92871e-09	-4.23343
MCEMP1	5.63412e-09	-3.62696
LIPC	5.03929e-09	-5.67655
PENK	4.78232e-09	-3.90802
CR2	4.55158e-09	-6.9309
RSPH1	4.36581e-09	-5.37274
STFA3	4.3447e-09	-5.17809
PRKCG	4.03233e-09	-4.78048
PLA2G2D	3.6025e-09	-4.0523
MX1	3.53957e-09	-3.17515
IL12A	3.53472e-09	-8.8251
NAP1L3	3.15541e-09	-4.87458
ERV3	2.86067e-09	-8.21224
AK7	2.83139e-09	-6.49018
B4GALNT4	2.83112e-09	-5.80149
CLGN	1.65969e-09	-4.60195
GM7609	1.28401e-09	-8.48456
CCL1	1.20977e-09	-6.36641
TRPM6	1.17846e-09	-5.57212
ESR1	1.03848e-09	-3.16277
P2RY10	7.93057e-10	-4.13347
FFAR1	7.81615e-10	-8.42862
GLYCAM1	7.75654e-10	-10.8027
SYT15	7.64313e-10	-6.45001
GREM1	7.47186e-10	-8.47677
HTR7	7.42166e-10	-4.7274
TNFSF11	7.31039e-10	-4.09428
PTPN5	6.91815e-10	-5.61281
MZB1	6.81504e-10	-7.37964
PRSS16	6.26609e-10	-4.26368
LTB	6.25386e-10	-4.92631
CXCR3	5.26462e-10	-5.24819
SCN4A	4.92791e-10	-6.43954
FCER2A	4.85997e-10	-7.6201
FAM167A	4.85209e-10	-5.63643
SCIMP	4.31392e-10	-5.4185
CREG2	3.939e-10	-4.06219
CUBN	3.36093e-10	-4.03853
KLK1B22	2.08045e-10	-8.51922
NGFR	1.81998e-10	-4.15223
DNASE1L3	1.62609e-10	-5.31842
AKR1CL	1.48741e-10	-8.697
HEPACAM2	1.35878e-10	-4.75392
CMAH	1.34678e-10	-3.84387
VEGFC	1.21956e-10	-3.8316
TMEM200B	1.2161e-10	-4.97191
D430019H16RIK	9.66605e-11	-5.51768
MIR155HG	9.63286e-11	-4.62496
TMCC2	9.60341e-11	-3.34375
LILRA5	9.47364e-11	-4.54736
CPNE7	8.96584e-11	-4.05375
BC028528	8.64956e-11	-3.5331
PCSK1	8.56102e-11	-9.18455
GFRA2	8.19636e-11	-4.04972
TSPAN33	7.20363e-11	-3.72756
ST8SIA6	5.48599e-11	-4.93742
CXCL10	4.95161e-11	-5.03104
NTRK1	3.61399e-11	-9.52744
KIF19A	3.53682e-11	-4.25629
BLK	2.95488e-11	-6.40415
OAS1A	2.94294e-11	-3.9419
KRT222	2.45316e-11	-4.31072
A2M	2.31761e-11	-5.41558
TRAM2	1.84621e-11	-4.77121
ZFP442	1.63852e-11	-4.5878
DNAJC6	1.08615e-11	-6.19029
SCPEP1OS	8.27747e-12	-3.66152
AZIN2	6.6524e-12	-3.79295
FAM160A1	5.19508e-12	-4.19401
ERO1LB	4.0412e-12	-3.01896
LTBP1	3.45715e-12	-3.40921
VIPR1	3.2866e-12	-4.43148
SRPK3	2.04032e-12	-4.90607
ROBO2	1.98355e-12	-5.46995
LAX1	1.80298e-12	-5.8532
AW011738	1.75974e-12	-3.82598
IFITM1	1.49012e-12	-4.25367
ANKRD55	1.38413e-12	-5.16354
CD79A	1.37817e-12	-6.51462
SLC17A9	1.26692e-12	-4.03129
SEMA3B	1.19184e-12	-4.89386
CCR6	1.1207e-12	-7.64853
SERPINA3F	9.87464e-13	-5.09206
ERMAP	9.45278e-13	-3.62834
CD79B	9.44592e-13	-5.4579
CPXM1	8.34421e-13	-4.35994
FOXF1	7.83573e-13	-4.77309
MS4A1	5.50228e-13	-6.94913
CMPK2	5.25846e-13	-3.80774
CASP4	4.5827e-13	-3.42234
PRG2	3.94892e-13	-7.22865
TIMD2	3.47415e-13	-7.37079
IFI27L2A	3.38939e-13	-4.68137
IGSF9B	3.18679e-13	-4.19576
PCDH15	2.80827e-13	-6.11851
HS3ST1	2.03772e-13	-5.60263
TLR9	1.98444e-13	-4.0375
FCMR	1.80399e-13	-6.07539
GM4841	1.40111e-13	-5.02478
A	1.2667e-13	-6.01513
GPR182	1.25219e-13	-4.63724
TIGIT	1.08059e-13	-5.10632
MSC	1.02548e-13	-4.9262
PAMR1	1.02505e-13	-3.83252
AOC1	1.02295e-13	-5.51596
GM12216	9.93834e-14	-5.18868
DERL3	8.63031e-14	-6.06047
CEACAM1	8.58538e-14	-3.84879
DNM3	8.02213e-14	-4.64942
RELN	7.04694e-14	-5.64751
GM7694	5.21491e-14	-4.76011
TNFRSF17	3.41271e-14	-5.38117
TRP73	3.23273e-14	-4.96727
IDO1	2.92069e-14	-5.95445
LY6D	2.33944e-14	-5.94861
UBD	1.70517e-14	-4.96969
BTNL2	1.33442e-14	-10.3988
BLNK	1.19776e-14	-4.79942
JCHAIN	1.15081e-14	-6.11029
A530032D15RIK	1.04848e-14	-5.8285
PRLR	9.54488e-15	-6.95581
GRAMD1C	7.42975e-15	-4.77262
DPT	7.31132e-15	-3.88882
RHPN2	2.68588e-15	-4.10896
RIPPLY3	2.48114e-15	-4.71326
CYP4F18	2.36328e-15	-4.35312
FLT4	2.13411e-15	-3.98329
RASSF6	2.12382e-15	-5.51994
BTLA	2.11644e-15	-5.19346
BANK1	1.69308e-15	-6.07582
FFAR2	1.36703e-15	-6.46615
GSTT1	9.47976e-16	-4.0567
GPR174	8.58813e-16	-4.72246
GM8369	8.36501e-16	-5.16869
ACKR1	7.96243e-16	-4.29717
SERPINA3G	7.4351e-16	-5.23121
TGTP2	6.81252e-16	-4.46847
INSRR	5.4568e-16	-5.26607
MME	4.88984e-16	-7.19623
CHL1	3.97217e-16	-3.24715
CACNA1S	3.44474e-16	-6.32861
UNC5C	1.9767e-16	-5.30593
GNAZ	1.4395e-16	-6.51644
PAX5	1.31793e-16	-8.66853
ELL2	1.30305e-16	-5.10922
H2-Q7	1.169e-16	-4.78264
5830428M24RIK	1.13782e-16	-5.62326
CSMD1	1.12638e-16	-3.85143
PPFIA4	1.0364e-16	-3.70029
OMP	9.07345e-17	-6.16486
OASL2	7.82853e-17	-3.35252
CD19	6.84839e-17	-7.28756
H2-Q9	5.64155e-17	-4.79091
CDH23	3.33455e-17	-7.61291
IFITM3	2.25817e-17	-3.28564
TNFRSF13C	1.93185e-17	-7.27859
LYNX1	1.23567e-17	-4.93252
KLK8	1.09391e-17	-5.33489
GPM6A	5.37601e-18	-4.08348
NRN1	4.71864e-18	-5.75286
BHLHA15	4.06228e-18	-6.41166
HAVCR2	1.44135e-18	-3.42095
TMEM163	1.30557e-18	-5.20282
ATOH8	9.75968e-19	-4.87172
VPREB3	7.87635e-19	-5.90677
NES	4.88353e-19	-4.09427
GBP6	4.17683e-19	-4.77314
GCSAM	3.5385e-19	-5.14339
ELL3	2.78748e-19	-4.73623
HIVEP3	2.44707e-19	-3.60259
MAP3K9	2.11296e-19	-4.34097
ILDR1	1.9035e-19	-4.80325
CACNA1H	1.57846e-19	-7.39469
CD109	1.39806e-19	-4.83668
IL21	1.21922e-19	-8.54818
H2-OB	9.3405e-20	-5.96613
H2-Q5	8.01185e-20	-4.51182
BCL11A	4.54677e-20	-7.22114
ACKR2	3.04367e-20	-5.70061
ARHGAP6	2.90166e-20	-4.70141
ICOS	2.62233e-20	-4.50799
AICDA	2.44157e-20	-9.77553
ST3GAL6	1.89971e-20	-4.27116
H2-EB2	1.88507e-20	-5.50187
HHEX	8.92353e-21	-3.76589
TGTP1	8.88952e-21	-5.66266
GM4951	7.45972e-21	-3.62036
SERPINA10	5.30034e-21	-7.38966
H2-EB1	5.00855e-21	-4.35487
GM12185	2.91279e-21	-5.57237
DTX1	2.83342e-21	-7.13281
LMO7	2.46093e-21	-3.92326
SPIB	1.33391e-21	-6.62066
SPINT1	1.12438e-21	-4.33799
DES	1.10956e-21	-3.99916
SORL1	1.01455e-21	-4.08035
RNASE6	9.76204e-22	-5.13657
SLAMF8	4.19006e-22	-4.61052
H2-AA	3.66564e-22	-4.10048
MCTP2	2.94617e-22	-4.89232
RUBCNL	2.6149e-22	-4.64189
SLC9A7	1.17072e-22	-4.9914
EAF2	8.32778e-23	-6.64897
LY6C2	1.55762e-23	-5.69636
VDR	1.41915e-23	-5.0756
CD74	1.0287e-23	-4.68059
SLAMF1	1.0013e-23	-4.35896
H2-AB1	6.87663e-24	-4.21725
SH2B2	4.97595e-24	-4.96983
TNFSF13B	9.86237e-25	-4.11222
SPON1	8.35602e-25	-4.47257
H2-Q6	6.22437e-25	-4.79838
H2-Q8	6.00722e-25	-4.80012
GM5547	3.9749e-25	-5.14409
CACNA1I	1.53341e-25	-4.49052
CXCR5	3.71188e-26	-5.6863
SIGLECG	3.31199e-26	-6.20196
CHST3	2.59484e-26	-7.76798
SPNS2	1.00163e-26	-4.00166
GPR183	4.22272e-27	-4.75676
IIGP1	1.00686e-27	-3.85136
RHOBTB1	6.36145e-28	-5.34707
CD22	5.67932e-28	-5.90312
DSC3	4.90674e-28	-5.18422
ALPL	4.34169e-28	-6.47073
SLC22A15	3.21531e-28	-4.53037
LRRK2	1.13375e-28	-5.33543
XAF1	1.04515e-28	-4.33751
FKBP11	8.99715e-29	-6.06888
HOOK1	3.78563e-29	-7.27862
GSTT3	3.36833e-29	-4.55949
FCRLA	1.73758e-29	-6.76605
SLFN1	1.2565e-29	-4.99665
SETBP1	4.88398e-30	-4.2464
RAB30	3.338e-30	-4.67362
ENPP2	4.40639e-31	-5.13759
SLCO2A1	2.60461e-31	-4.2863
H2-OA	4.12509e-32	-4.98496
H2-DMB2	2.32579e-33	-6.13987
STAC2	2.15884e-33	-6.89106
CIITA	8.50683e-34	-5.25797
CPEB3	5.90077e-34	-3.85825
FAM46C	5.90077e-34	-4.51688
SSPN	5.53056e-34	-4.69432
BACH2	2.00147e-34	-5.05328
TBC1D4	1.71747e-34	-4.9416
P2RY13	5.28797e-35	-4.49331
ISG20	2.698e-35	-5.49692
PACSIN1	2.01966e-35	-7.03287
TMEM154	1.08173e-35	-4.83803
GBP8	6.97737e-36	-3.93794
TNFSF10	6.32615e-37	-4.79544
MS4A6B	3.81152e-37	-3.9005
DENND5B	3.56343e-37	-6.17401
XBP1	1.91579e-37	-4.7626
FAXC	4.96471e-38	-5.29825
ZBTB32	4.81789e-40	-5.26847
ITGB3	2.07089e-41	-4.30293
CHST1	5.01864e-42	-5.48452
CPEB2	9.17323e-45	-4.19497
SOSTDC1	1.41752e-45	-6.6301
CREB3L2	1.95369e-49	-4.96049
ST14	7.33598e-51	-4.98869
DSC2	5.52137e-53	-5.69441
LY6A	1.03398e-53	-5.64683
MEF2C	1.28798e-55	-5.53578
RASGRP3	2.38915e-57	-6.14054
CAPN5	2.7949e-61	-5.14081
CRELD2	2.6518e-65	-4.0116
CLU	8.24518e-72	-5.70354
BHLHE41	6.72e-86	-5.09885
